# Supplementary material for: Phosphorylation of IRS1 at Serine 307 in Response to Insulin in Human Adipocytes Is Not Likely to be Catalyzed by p70 Ribosomal S6 Kinase
Source: PubMed Central journal article supplement (PMC3614923; doi:10.1371/journal.pone.0059725), 2013-04-02

# Supporting information

Figure S1

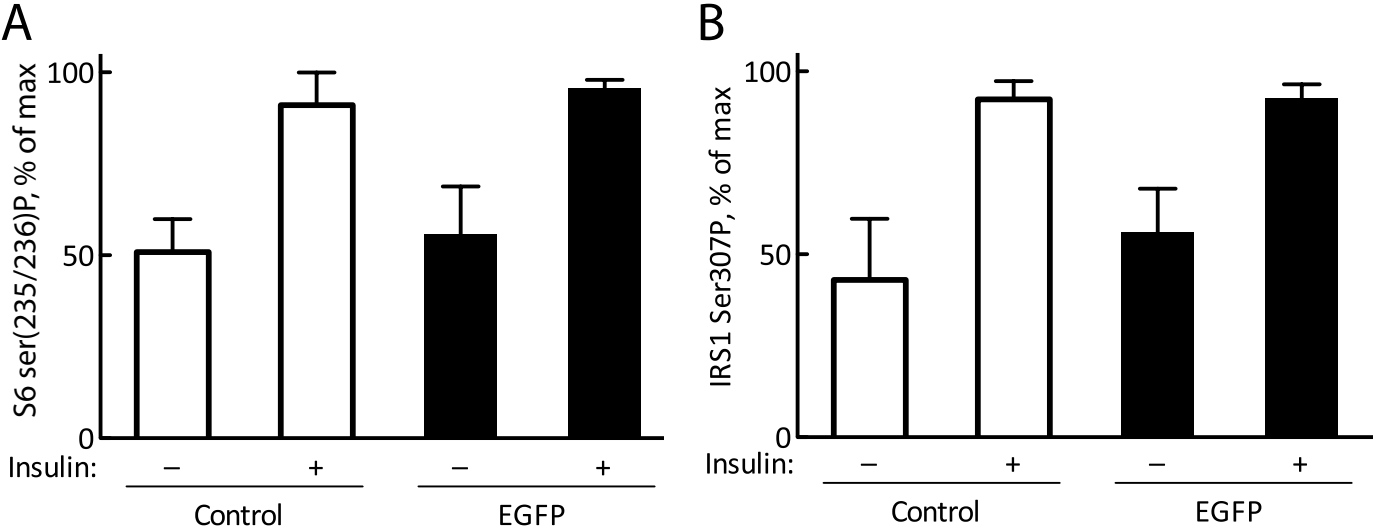

Supplement: pone.0059725.s001.pdf [file pone.0059725.s001.pdf]
